# Supplementary material for: Size and morphology-controlled synthesis of vernier yttrium oxyfluoride towards enhanced photoluminescence and white light emission
Source: Royal Society of Chemistry journal article supplement (doi:10.1039/c8nj01962b), 2018-01-01
Supplement: c8nj01962b1.pdf [file c8nj01962b1.pdf]

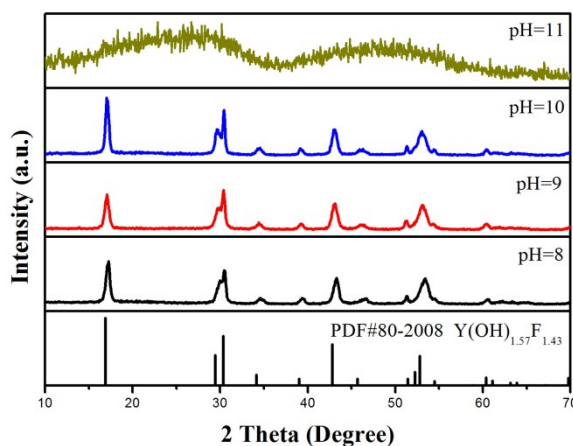

**Fig. S1** XRD patterns of as-prepared  $Y(OH)_{1.57}F_{1.43}$  under the different pH value.

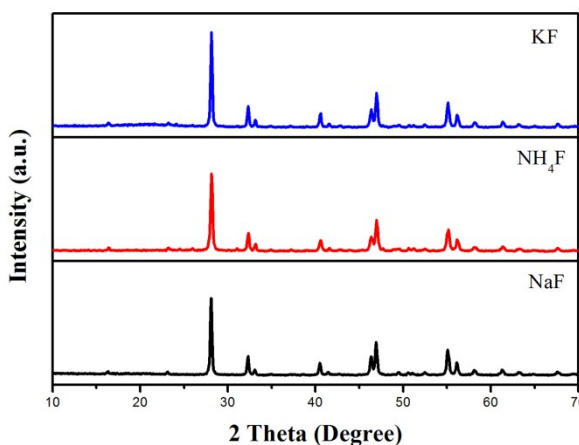

**Fig. S2** XRD patterns of V-YOF with different  $F^-$  sources.

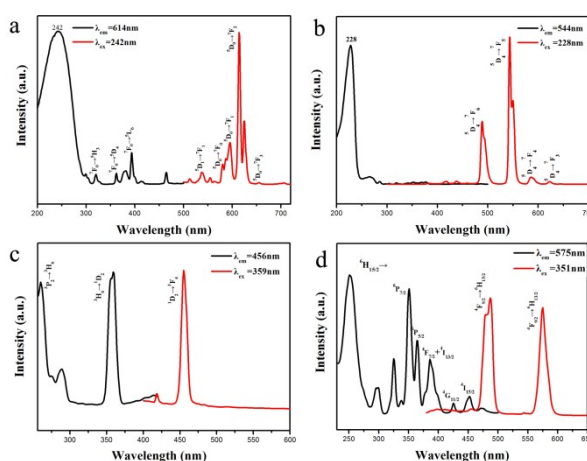

**Fig. S3** PLE and PL spectra of V-YOF:0.05 $Eu^{3+}$  (a), V-YOF:0.05 $Tb^{3+}$  (b), V-YOF:0.05 $Tm^{3+}$  (c), V-YOF:0.05 $Dy^{3+}$  (d).

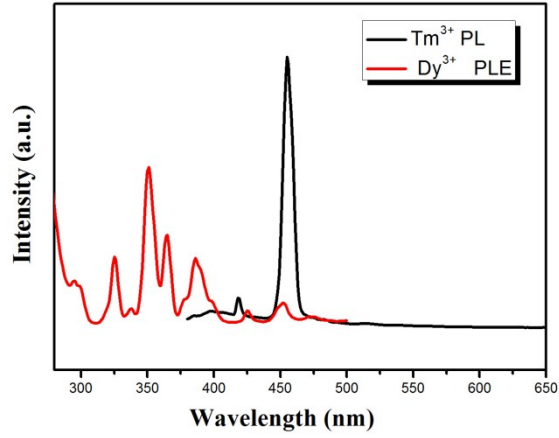

**Figure. S4** PL excitation spectra of V-YOF:Dy<sup>3+</sup> and PL spectra of V-YOF:Tm<sup>3+</sup> Phosphors.

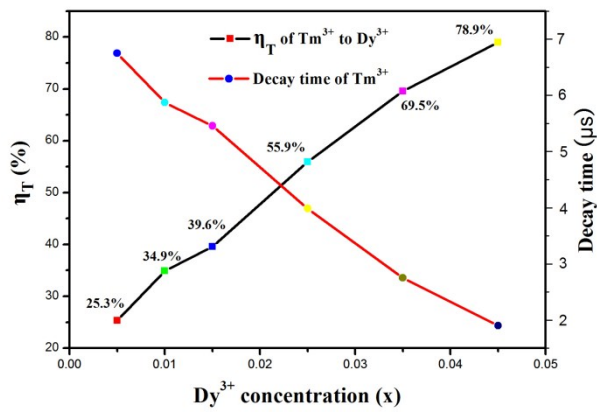

**Fig. S5** Scatter plot of decay time of Tm<sup>3+</sup> and energy transfer efficiency from Tm<sup>3+</sup> to Dy<sup>3+</sup>.

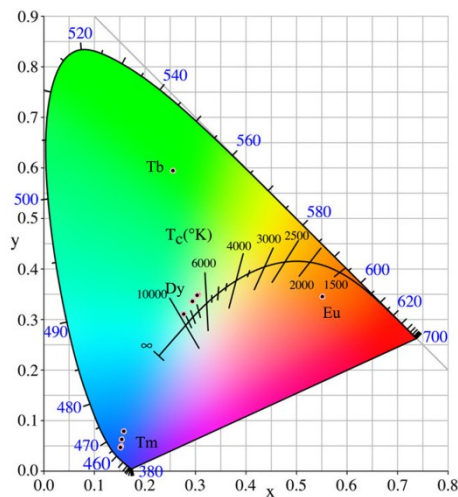

**Fig. S6** CIE chromaticity diagram for V-YOF:0.05Ln<sup>3+</sup> (Ln= Tm, Dy, Tb, Eu) synthesized under different conditions.

**Table. S1** CIE chromaticity coordinates (x, y) for V-YOF:0.05Ln<sup>3+</sup> (Ln= Tm, Dy, Tb, Eu) synthesized under different conditions.

| Sample                     | pH=8          | pH=8              | pH=8          | pH=10         | Standard          |
|----------------------------|---------------|-------------------|---------------|---------------|-------------------|
| CIE(x,y)                   | NaF           | NH <sub>4</sub> F | KF            | NaF           | color coordinates |
| Condition                  |               |                   |               |               |                   |
| V-YOF:0.05Tm <sup>3+</sup> | (0.153,0.049) | (0.155,0.062)     | (0.158,0.079) | (0.152,0.046) | Blue (0.14,0.08)  |
| V-YOF:0.05Dy <sup>3+</sup> | (0.307,0.350) | (0.278,0.310)     | (0.295,0.336) | (0.304,0.348) | White (0.33,0.33) |
| V-YOF:0.05Tb <sup>3+</sup> | (0.255,0.590) | (0.255,0.589)     | (0.255,0.589) | (0.257,0.595) | Green (0.21,0.71) |
| V-YOF:0.05Eu <sup>3+</sup> | (0.534,0.344) | (0.491,0.316)     | (0.541,0.344) | (0.552,0.346) | Red (0.67,0.33)   |
